# Supplementary material for: Development of a Novel Chimeric Endolysin, Lys109 With Enhanced Lytic Activity Against Staphylococcus aureus
Source: PubMed Central journal article supplement (PMC7843465; doi:10.3389/fmicb.2020.615887), 2021-01-15
Supplement: Data_Sheet_1.pdf [file Data_Sheet_1.pdf]

## Supplementary material

**Table S1. Plasmids and primers used in this study**

| Plasmid            | Description                                                    |
|--------------------|----------------------------------------------------------------|
| pET28a             | Kan <sup>r</sup> , T7 promoter, His-tagged expression vector   |
| pBAD33             | Amp <sup>r</sup> , araC, P <sub>BAD</sub> , pBR322 <i>ori</i>  |
| pET28a-LSA12CBD    | pET28a with LSA12CBD                                           |
| pET28a-LSA97CBD    | pET28a with LSA97CBD                                           |
| pET28a-LSA11CBD    | pET28a with LSA11CBD                                           |
| pET28a-LSAP4CBD    | pET28a with LSAP4CBD                                           |
| Primers            | Sequence                                                       |
| EcoR1_SPN1SlysRz_F | AAA <u>GAA TTC</u> GGA GTG AAA CGA TGG ACA TTA ACC AGT TCC GGC |
| SPN1SlysRz_Sall_R  | TTT <u>GTC GAC</u> TCA CCT GGT CAG CGA ATC GTA C               |
| BamH1_LSA12CHAP_F  | AAA <u>GGA TCC ATGC</u> AAG CAA AAC TAA CTA AAA A              |
| LSA12CHAP_BamH1_R  | TTT <u>GGA TCC TGA TCG TGG AGC TGT TTC GCT T</u>               |
| LSA12CHAP_Xho1_R   | TTT <u>CTC GAG TGA TCG TGG AGC TGT TTC GCT T</u>               |
| BamH1_LSA12AMI_F   | AAA <u>GGA TCC GTA CAA TCT CCT ACG CAA GCA</u>                 |
| LSA12AMI_BamH1_R   | TTT <u>GGA TCC ACT TGA AGC GCT TGA CTC ATT AG</u>              |
| LSA12AMI_Xho1_R    | TTT <u>CTC GAG ACT TGA AGC GCT TGA CTC ATT AG</u>              |
| BamH1_LSA97CHAP_F  | AAA <u>GGA TCC ATG CCG TCG GTT AGG ACA TAC AG</u>              |
| LSA97CHAP_BamH1_R  | TTT <u>GGA TCC TTC TTT TGC GTA GAA TGG ACG GAT</u>             |
| LSA97CHAP_Xho1_R   | AAA <u>CTC GAG ATG CCG TCG GTT AGG ACA TAC AG</u>              |
| BamH1_LSA97AMI_F   | AAA <u>GGA TCC CAA GAT AAG TTA TCA AAA GGT AAA</u>             |
| LSA97AMI_BamH1_R   | TTT <u>GGA TCC ACT ACT TGG CGC ATC AAT TTG TC</u>              |
| LSA97AMI_Xho1_R    | TTT <u>CTC GAG ACT ACT TGG CGC ATC AAT TTG TC</u>              |
| BamH1_LSAP4CHAP_F  | AAA <u>GGA TCC GGG AAG CAG TTC AAT CCT GAT TT</u>              |
| LSAP4CHAP_BamH1_R  | TTT <u>GGA TCC TTT ATC TGG GAA ATT TAA TCT AA</u>              |
| LSAP4CHAP_Xho1_R   | TTT <u>CTC GAG TTT ATC TGG GAA ATT TAA TCT AA</u>              |
| BamH1_LSAP4AMI_F   | AAA <u>GGA TCC AAA GTA AGT GTT GGA GAT AAA GC</u>              |
| LSAP4AMI_BamH1_R   | TTT <u>GGA TCC TTG GTT TTT AGC TGA TGT TTT AAC</u>             |
| LSAP4AMI_Xho1_R    | TTT <u>CTC GAG TTG GTT TTT AGC TGA TGT TTT AAC</u>             |
| BamH1_LSA11CHAP_F  | AAA <u>GGA TCC ATG AAA GCA TCG ATG ACT AGA AG</u>              |
| LSA11CHAP_BamH1_R  | TTT <u>GGA TCC GTC TTT GAA ATT AGG TTC TAT AA</u>              |
| LSA11CHAP_Xho1_R   | TTT <u>CTC GAG GTC TTT GAA ATT AGG TTC TAT AA</u>              |

**Table S2. Domain composition of the selected clones**

| Clone | CHAP | Amidase    | CBD  |
|-------|------|------------|------|
| 1     | SA12 |            | SA11 |
| 2     | SA12 |            | SA12 |
| 3     | SA12 |            | SA97 |
| 4     | SA12 | SA12       | SA97 |
| 5     | SA12 |            | SAP4 |
| 6     | SA12 | SA97       | SA12 |
| 7     | SA12 | SA97       | SA97 |
| 8     | SA12 | SA12       | SAP4 |
| 9     | SA12 | SA97       | SAP4 |
| 10    | SA12 | SAP4       | SA12 |
| 11    | SA12 | SAP4       | SAP4 |
| 12    | SA11 | SA12       | SAP4 |
| 13    | SA11 |            | SA12 |
| 14    | SAP4 | SA12       | SA12 |
| 15    | SA11 | SA12       | SA12 |
| 16    | SA11 |            | SA11 |
| 17    | SA12 | SA12       | SA12 |
| 18    | SA11 | SA12(CHAP) | SA11 |
| 19    | SA12 | SA97       | SA11 |

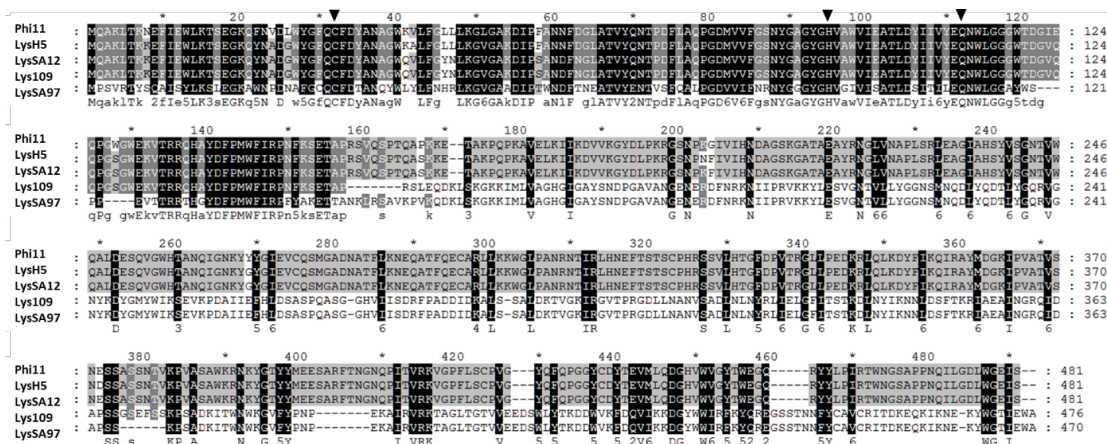

**Figure S1. Sequence alignment of Lys109 with other related endolysins.** phi11, *S. aureus* phage phi11 endolysin; LysH5, *S. aureus* phage vB\_SauS-phiIPLA88 endolysin; LysSA12, *S. aureus* phage SA12 endolysin; LysSA97, *S. aureus* phage SA97 endolysin. Conserved and identical residues are shaded in gray (dark gray, >70% conserved; light gray, >40% conserved) and black, respectively. The conserved Cys-His-Asn triad is indicated by triangles.

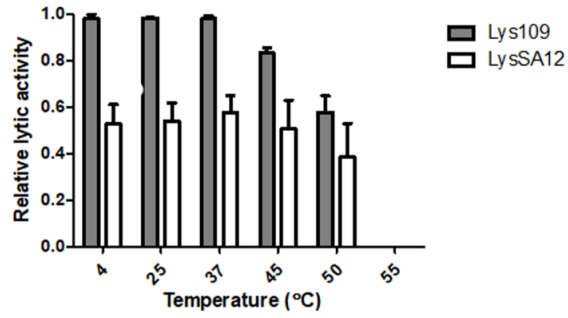

**Figure S2. Thermal stability of Lys109 and LysSA12.** Enzymes (300 nM each) were incubated at different temperatures for 30 min prior to the lysis assay that was performed against *S. aureus* CCARM 3090 at 25 °C. The relative lytic activities were calculated using the activity of Lys109 stored in a buffer pH 6.5 and at 25 °C, which showed a maximal activity.

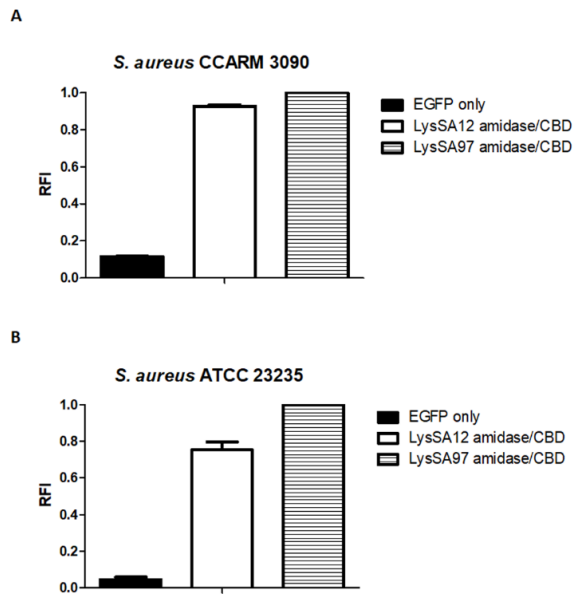

**Figure S3. Binding activity comparison among EGFP\_LysSA12 amidase domain plus CBD and EGFP\_LysSA97 amidase domain plus CBD.** The relative binding activity of 1  $\mu$ M of EGFP\_LysSA12 amidase domain plus CBD and EGFP\_LysSA97 amidase domain plus CBD toward **(A)** *S. aureus* CCARM 3090 and **(B)** *S. aureus* ATCC 23235. The binding activity was presented as relative fluorescence intensity (RFI) to the highest measured value. EGFP only did not show binding to *S. aureus*.
